# Supplementary material
Source: publisher figshare collection journal article supplement (https://karger.figshare.com/articles/dataset/_/5121691)
Supplement: Supplementary file 1 [file 1]

Archive with 3 entries (3 files):
- 000323955_sm_Figure.pdf
- 000323955_sm_Table_1.pdf
- 000323955_sm_Table_2.xls
