# Supplementary material
Source: publisher figshare collection journal article supplement (https://karger.figshare.com/articles/dataset/_/5121691)
Supplement: Supplementary file 1 [file 1 › 000323955_sm_Figure.pdf]

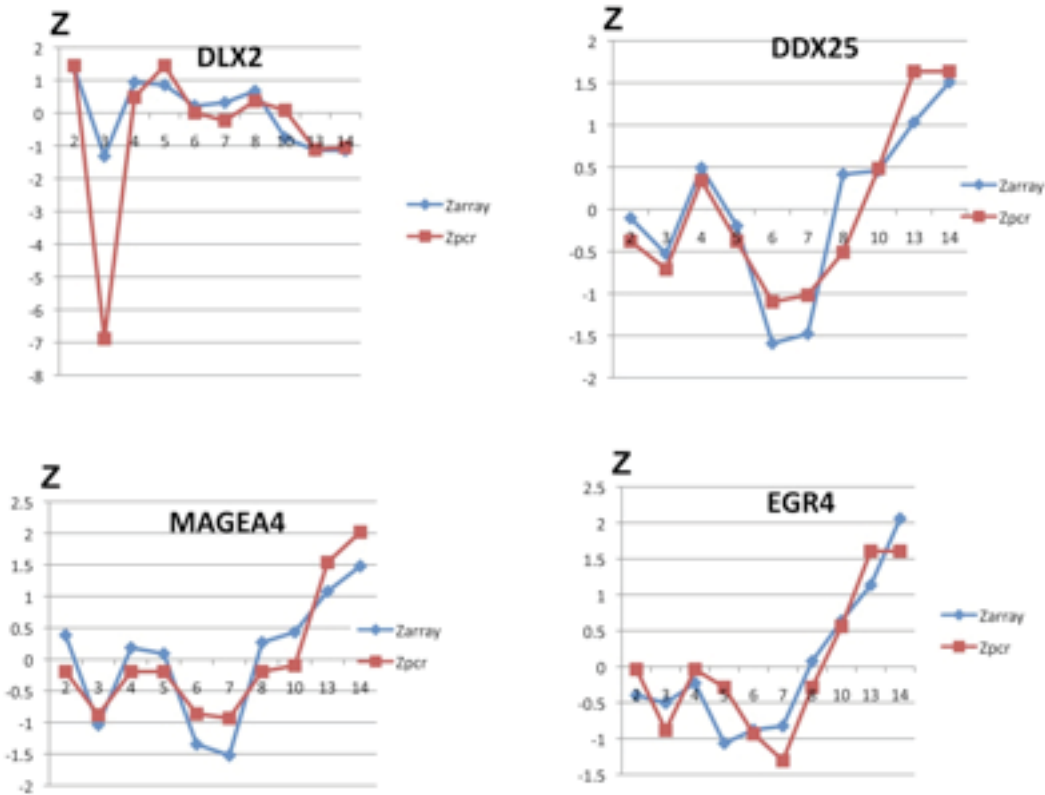

Fig. 1suppl. Correlation of microarray data with data obtained by qRT-PCR on 4 genes that displayed significant expression changes, showing a high correlation in the obtained transcriptional profiles. The y-axis is Z-normalized log2 expression (array) and 2-normalized QT value (qPCR). The x-axis shows biopsy file names. Spearman correlation coefficient was used for data comparison; DLX2:  $r_s = 0.918$ ,  $p = 0.00043$ ; DDX25:  $r_s = 0.945$ ,  $p = 0.00014$ ; MAGEA4:  $r_s = 0.880$ ,  $p = 0.000026$ ; EGR4:  $r_s = 0.838$ ,  $p = 0.0038$ .
