# Supplementary material
Source: publisher figshare collection journal article supplement (https://karger.figshare.com/articles/dataset/_/5121691)
Supplement: Supplementary file 1 [file 1 › 000323955_sm_Table_1.pdf]

| ANTIBODY | ANIMAL | CODE           | BATCH      | SOURCE     |
|----------|--------|----------------|------------|------------|
| DDX25    | GOAT   | SC-51269       | POLYCLONAL | SANTA-CRUZ |
| EGR1     | MOUSE  | AB54966        | MONOCLONAL | ABCAM      |
| EGR4     | GOAT   | SC-19868       | POLYCLONAL | SANTA-CRUZ |
| KLF4     | RABBIT | AB-26648/64129 | POLYCLONAL | ABCAM      |
| CBL      | MOUSE  | SC-1651        | MONOCLONAL | SANTA-CRUZ |
| ALDH1    | MOUSE  | SC-22591/1008  | MONOCLONAL | SANTA-CRUZ |
| MAGEA4   | GOAT   | SC-28484/62006 | POLYCLONAL | SANTA-CRUZ |
| COL4A3   | GOAT   | SC-18177/L1404 | POLYCLONAL | SANTA-CRUZ |

**Suppl. Table 1.** Antibodies utilized for immunohistochemical validation
