# Supplementary material
Source: publisher figshare collection journal article supplement (https://karger.figshare.com/articles/dataset/_/5121691)
Supplement: Supplementary file 1 [file 1 › 000323955_sm_Table_2.xls]

## Sheet: Tabelle1
Suppl.Table 2.Genes down-regulated in the HAZR group proposed to be involved in spermatogonia self-renewal [Wu et al., 2009]
Gene	ID	HAZR	LAZR	CONTR	adjusted p HAZR / con. HAZR / LAZR
							Gene official full name
BAIAP2L1	227 372 s-at	3,77	7,29	7,59	0,001	0,0001	BAI1-associated protein 2-like 1
CASC5	228 323 at	4,52	6,17	6,67	0,02	0,03	cancer susceptibility candidate 5
CCDC150	232 398 at	3,39	4,21	4,46	0,01	n.s.	coiled-coil domain containing 150
CCNB1	214 710 at	5,82	7,14	6,98	0,04	0,002	cyclin B1
CENPE	205 046 at	4,03	5,23	5,49	0,004	0,001	centromere protein E
CENPF	207 828 s-at	5,65	6,88	6,92	0,004	0,0005	centromere protein F, 350/400kDa (mitosin)
CT47	231 568 at	4,17	6,75	7,54	0,008	0,007	cancer/testis antigen family 47, member A10
DPPA2	240 301 at	5,14	7,72	7,22	0,02	0,0003	developmental pluripotency associated 2
DPPA4	232 985 s-at	4,73	6,04	5,92	0,01	0,02	developmental pluripotency associated 2		associated 4
ELAVL2	228 260 at	4,98	9,08	9,9	0,001	0,0001	ELAV (embryonic lethal, abnormal vision, Drosophila)-like 2 (Hu antigen B)
ETV5	203 348 at	6,67	7,73	7,78	0,004	0,01	ets variant 5
FHL1	201 540 at	9,0	9,58	9,93	0,01	n.s.	four and a half LIM domains 1
GCNT2	230 788 at	3,84	5,66	5,72	0,005	0,0002	glucosaminyl (N-acetyl) transferase 2, I-branching enzyme (I blood group)
MAGEA6	214 612 x-at	2,97	6,76	7,57	0,001	0,0001	melanoma antigen family A, 6
MAP7D2	228 262 at	4,32	6.19	6,33	0,02	0,002	MAP7 domain containing 2
RBM24	235 004 at	4,42	5,94	6,75	0,003	0,009	RNA binding motif protein 24
RHOXF2	236 920 at	5,17	7,89	8,04	0,005	0,0006	Rhox homeobox family, member 2
RNFI82	230 720 at	4,06	4,96	5,57	0,02	n.s.	ring finger protein 182
SALL1	229 661 at	5,87	6,64	7,09	0,01	n.s.	sal-like 1 (Drosophila)
SLC25A31	221 037 s-at	3,07	5,73	5,99	0,003	0,0005	solute carrier family 25 (mitochondrial carrier; adenine nucleotide translocator), member 31
SSX3	207 666 x-at	5,1	5,88	6,88	0,03	n.s.	synovial sarcoma, X breakpoint 3
STK31	223 883 s-at	4,43	8,25	8,64	0,001	8,24E-05	serine/threonine kinase 31
TEX15	221 448 at	9,92	4,72	5,4	0,009	0,006	testis expressed 15
TFAP2A	204 656 at	4,56	5,95	6,01	0,007	0,0004	transcription factor AP-2 alpha (activating enhancer binding protein 2 alpha)
TSPYL6	232 339 at	3,64	6,47	7,02	0,006	0,003	TSPY-like 6
VASA	221 630 s-at	3,47	7,05	7,43	0,001	8,24E-05	vasa RNA helicase
WDR21C	155 3197 at	3,15	6,6	6,86	0,001	0,0001	DDB1 and CUL4 associated factor 4-like 2
